# Supplementary material for: Construction of Hierarchical CuO/Cu2O@NiCo2S4 Nanowire Arrays on Copper Foam for High Performance Supercapacitor Electrodes
Source: PubMed Central journal article supplement (PMC5618384; doi:10.3390/nano7090273), 2017-09-15
Supplement: nanomaterials-07-00273-s001.pdf [file nanomaterials-07-00273-s001.pdf]

## Supplementary Materials

### Construction of hierarchical $\text{CuO}/\text{Cu}_2\text{O}@/\text{NiCo}_2\text{S}_4$ nanowire arrays on copper foam for high performance supercapacitor electrodes

Luoxiao Zhou, Ying He, Congpu Jia, Vladimir Pavlinek, Petr Saha, Qilin Cheng

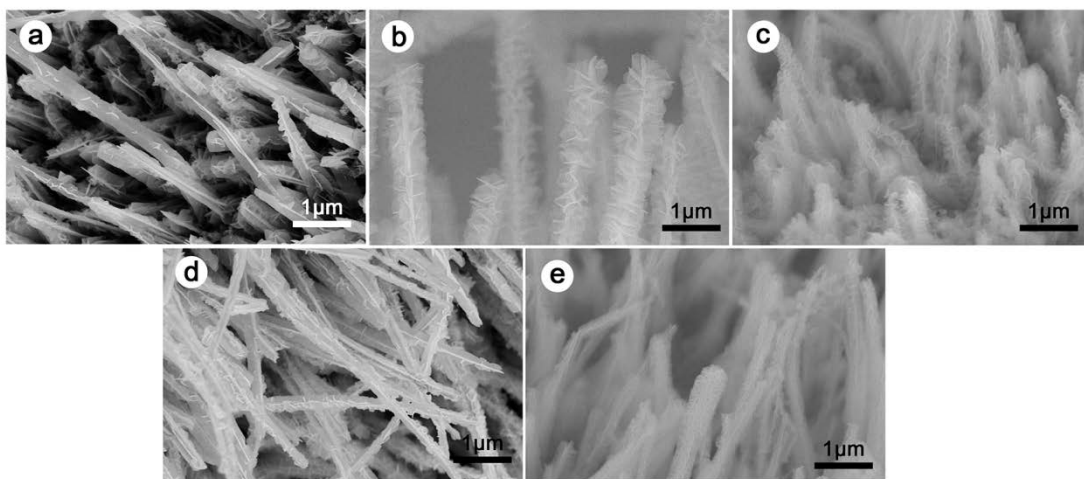

Figure S1. SEM images of (a)  $\text{CuO}/\text{Cu}_2\text{O}@/\text{NiCo}_2\text{S}_4$ -1, (b)  $\text{CuO}/\text{Cu}_2\text{O}@/\text{NiCo}_2\text{S}_4$ -2, (c)  $\text{CuO}/\text{Cu}_2\text{O}@/\text{NiCo}_2\text{S}_4$ -3, (d)  $\text{CuO}/\text{Cu}_2\text{O}@/\text{NiCo}_2\text{S}_4$ -4, (e)  $\text{CuO}/\text{Cu}_2\text{O}@/\text{NiCo}_2\text{S}_4$ -5

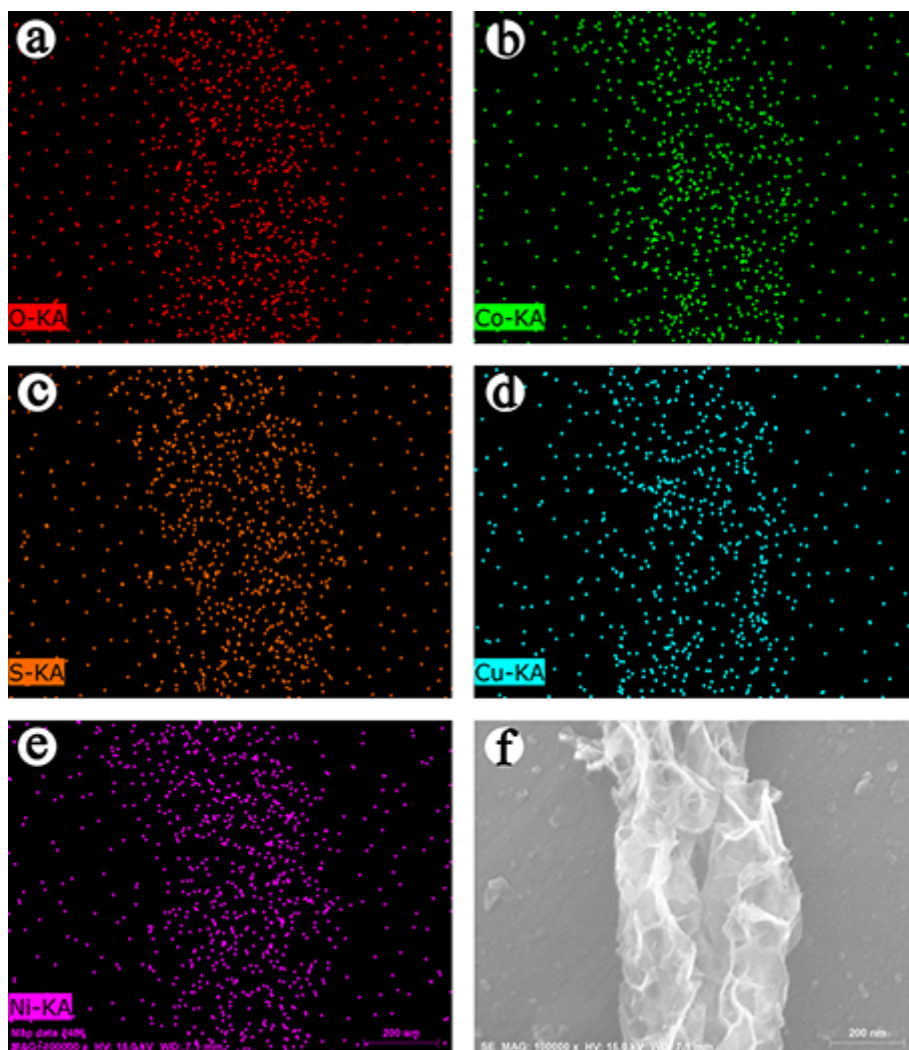

Figure S2. EDS mapping of (a) O element, (b) Co element, (c) S element and (d) Cu elements (e) Ni element and (f) the cross section of CuO/Cu<sub>2</sub>O@ NiCo<sub>2</sub>S<sub>4</sub>-4.
